# Supplementary material for: Biphasic liquid mixtures of ionic liquids and polyethylene glycols
Source: Royal Society of Chemistry journal article supplement (doi:10.1039/b916990c), 2009-01-01
Supplement: b916990c.pdf [file b916990c.pdf]

## **Electronic Supplementary Information**

### **Biphasic liquid mixtures of ionic liquids and polyethylene glycols**

*Héctor Rodríguez, María Francisco, Mustafizur Rahman, Ning Sun, and Robin D. Rogers*

#### **Quadratic fittings in the van't Hoff plots**

For correlation of the data points in the van't Hoff plot of the main manuscript (Figure 4), the following quadratic equation was used:

$$\ln K = a + \frac{b}{T} + \frac{c}{T^2}$$

whose elements are already described in the main manuscript (eq. 2). The resulting parameters from the fitting are reported in Table S.1, along with the square of the correlation coefficient, as an indicator of the quality of the fitting.

**Table S.1.** Fitting parameters ( $a$ ,  $b$ ,  $c$ ) of eq. 2, and corresponding square values of the correlation coefficients ( $R^2$ ), for the correlation of the LLE data of the binary systems IL+PEG.

| System                            | $a$   | $b / 10^3 \text{ K}$ | $c / 10^5 \text{ K}^2$ | $R^2$  |
|-----------------------------------|-------|----------------------|------------------------|--------|
| [C <sub>2</sub> mim]Cl + PEG-1500 | -2.39 | 1.28                 | -1.88                  | 0.9990 |
| [C <sub>2</sub> mim]Cl + PEG-2000 | -6.48 | 4.01                 | -6.59                  | 0.9979 |
| [C <sub>2</sub> mim]Cl + PEG-3400 | -14.7 | 9.60                 | -16.3                  | 0.9990 |
| [C <sub>4</sub> mim]Cl + PEG-2000 | -1.11 | 0.633                | -1.01                  | 0.9811 |
| [C <sub>4</sub> mim]Cl + PEG-3400 | -6.87 | 4.54                 | -7.75                  | 0.9939 |

#### **Comparison of enthalpic and entropic contributions to the change of Gibbs free energy of mixing ( $\Delta G_m$ )**

With the coefficients reported in Table S.1, the change of enthalpy of mixing ( $\Delta H_m$ ) and change of entropy of mixing ( $\Delta S_m$ ) can be easily calculated by means of eq. 3 and 4 in the main manuscript. Table S.2 reports  $\Delta H_m$  (which is the enthalpic contribution to  $\Delta G_m$ ),  $\Delta S_m$ ,

and the product  $T \cdot \Delta S_m$ , (which corresponds to the entropic contribution to  $\Delta G_m$ ), allowing direct comparison of the enthalpic and the entropic contribution to the change of Gibbs free energy of mixing, for all the studied LLE systems at the different experimental temperatures.

**Table S.2.** Change of enthalpy of mixing ( $\Delta H_m$ ) and change of entropy of mixing ( $\Delta S_m$ ) calculated from the LLE data of the binary systems IL+PEG. The entropic contribution ( $T \cdot \Delta S_m$ ) to the Gibbs free energy of mixing ( $\Delta G_m$ , see eq. 5) is also reported, for direct comparison with  $\Delta H_m$ .

| $T / \text{K}$                    | $\Delta H_m / \text{kJ} \cdot \text{mol}^{-1}$ | $\Delta S_m / \text{J} \cdot \text{mol}^{-1} \cdot \text{K}^{-1}$ | $T \cdot \Delta S_m / \text{kJ} \cdot \text{mol}^{-1}$ |
|-----------------------------------|------------------------------------------------|-------------------------------------------------------------------|--------------------------------------------------------|
| [C <sub>2</sub> mim]Cl + PEG-1500 |                                                |                                                                   |                                                        |
| 333.15                            | -1.37                                          | -5.96                                                             | -1.98                                                  |
| 353.15                            | -1.89                                          | -7.49                                                             | -2.64                                                  |
| 373.15                            | -2.36                                          | -8.78                                                             | -3.27                                                  |
| 393.15                            | -2.78                                          | -9.87                                                             | -3.88                                                  |
| 413.15                            | -3.16                                          | -10.8                                                             | -4.47                                                  |
| [C <sub>2</sub> mim]Cl + PEG-2000 |                                                |                                                                   |                                                        |
| 333.15                            | -0.464                                         | -4.48                                                             | -1.49                                                  |
| 353.15                            | -2.33                                          | -9.91                                                             | -3.50                                                  |
| 373.15                            | -3.99                                          | -14.5                                                             | -5.41                                                  |
| 393.15                            | -5.48                                          | -18.4                                                             | -7.23                                                  |
| 413.15                            | -6.83                                          | -21.7                                                             | -8.98                                                  |
| [C <sub>2</sub> mim]Cl + PEG-3400 |                                                |                                                                   |                                                        |
| 333.15                            | 1.32                                           | -0.406                                                            | -0.135                                                 |
| 353.15                            | -3.28                                          | -13.8                                                             | -4.88                                                  |
| 373.15                            | -7.38                                          | -25.1                                                             | -9.37                                                  |
| 393.15                            | -11.1                                          | -34.7                                                             | -13.7                                                  |
| 413.15                            | -14.4                                          | -43.0                                                             | -17.8                                                  |
| [C <sub>4</sub> mim]Cl + PEG-2000 |                                                |                                                                   |                                                        |
| 333.15                            | -0.202                                         | -1.60                                                             | -0.532                                                 |
| 353.15                            | -0.489                                         | -2.43                                                             | -0.859                                                 |
| 373.15                            | -0.745                                         | -3.14                                                             | -1.17                                                  |
| 393.15                            | -0.974                                         | -3.74                                                             | -1.47                                                  |
| 413.15                            | -1.18                                          | -4.25                                                             | -1.76                                                  |
| [C <sub>4</sub> mim]Cl + PEG-3400 |                                                |                                                                   |                                                        |
| 333.15                            | 0.939                                          | 0.915                                                             | 0.305                                                  |
| 353.15                            | -1.25                                          | -5.47                                                             | -1.93                                                  |
| 373.15                            | -3.21                                          | -10.9                                                             | -4.05                                                  |
| 393.15                            | -4.96                                          | -15.4                                                             | -6.07                                                  |
| 413.15                            | -6.55                                          | -19.4                                                             | -8.01                                                  |
